# Supplementary material
Source: HighWire-hosted journal article supplement (https://innovations.bmj.com/highwire/filestream/139851/field_highwire_adjunct_files/0/bmjinnov-2023-001141supp001_data_supplement.pdf)
Supplement: bmjinnov-2023-001141supp001_data_supplement.pdf [file bmjinnov-2023-001141supp001_data_supplement.pdf]

## Appendices

### Appendix 1 – Twinning application form

|                |                                     |  |
|----------------|-------------------------------------|--|
| <b>Adopter</b> | Contact person (name and surname)   |  |
|                | Email address of the contact person |  |
|                | Organisation name                   |  |
|                | Address of the organisation         |  |
|                | Name of the reference site          |  |

|                   |                                     |  |
|-------------------|-------------------------------------|--|
| <b>Originator</b> | Contact person (name and surname)   |  |
|                   | Email address of the contact person |  |
|                   | Organisation name                   |  |
|                   | Address of the organisation         |  |
|                   | Name of the reference site          |  |
|                   | Title of the innovative practice    |  |

|                                                                   |                                                                                                                                                                                                                                                  |                                                                  |
|-------------------------------------------------------------------|--------------------------------------------------------------------------------------------------------------------------------------------------------------------------------------------------------------------------------------------------|------------------------------------------------------------------|
| <b>Innovative practice</b><br>(to be filled in by the Originator) | <b>Innovative practice description</b><br>Please describe why the practice was developed, what problems does it attempt to solve; its development methodology (research, testing, implementation) and what have been its most relevant outcomes. |                                                                  |
|                                                                   | <b>Please specify the type of innovative practice for AHA is being shared in this twinning</b><br>(Mark the correct option(s) with an X)                                                                                                         | Regional/national HER systems and summaries                      |
|                                                                   |                                                                                                                                                                                                                                                  | Care provider EHR systems integration (joined-up/shared records) |
|                                                                   |                                                                                                                                                                                                                                                  | ePrescription system                                             |
|                                                                   |                                                                                                                                                                                                                                                  | Integrated medicines management                                  |
|                                                                   |                                                                                                                                                                                                                                                  | ICT tools supporting adherence to care plans                     |
|                                                                   |                                                                                                                                                                                                                                                  | Technology for falls prevention                                  |

|  |                                                                              |                                                                              |
|--|------------------------------------------------------------------------------|------------------------------------------------------------------------------|
|  |                                                                              | ICT-supported integration of health and social care services                 |
|  |                                                                              | Homecare, tele monitoring and mobile health systems                          |
|  |                                                                              | Multi-disciplinary team support, workflow, care planning and co-ordination   |
|  |                                                                              | Health and care needs assessment toolkit                                     |
|  |                                                                              | Tele-mentoring and virtual consultations                                     |
|  |                                                                              | Telecare service / call centre                                               |
|  |                                                                              | Online health portals                                                        |
|  |                                                                              | Age-friendly buildings                                                       |
|  |                                                                              | Robotics                                                                     |
|  |                                                                              | Apps/ web platforms                                                          |
|  |                                                                              | Training programs for patients/users                                         |
|  |                                                                              | Training programs for health professionals                                   |
|  |                                                                              | Other, specify.                                                              |
|  | Which region(s)/country(s) developed the practice?                           |                                                                              |
|  | What is the scope of the innovative practice?<br>(Mark one option with an X) | Regional                                                                     |
|  |                                                                              | National                                                                     |
|  |                                                                              | European                                                                     |
|  |                                                                              | Trans-continental                                                            |
|  |                                                                              | other                                                                        |
|  | What is the TRL of the practice<br>(Mark one option with an X)               | TRL1                                                                         |
|  |                                                                              | TRL2                                                                         |
|  |                                                                              | TRL3                                                                         |
|  |                                                                              | TRL4                                                                         |
|  |                                                                              | TRL5                                                                         |
|  |                                                                              | TRL6                                                                         |
|  |                                                                              | TRL7                                                                         |
|  |                                                                              | TRL8                                                                         |
|  |                                                                              | TRL9                                                                         |
|  |                                                                              | Unsure (will update later)                                                   |
|  | Was the innovative practice designed to:<br>(Select all that apply)          | Allow co creation with users (development phase)?                            |
|  |                                                                              | Take into account user's feedback promoting a feedback loop of improvements? |

|  |                                                                                                                                                                                                                                                                                       |                                                                                                  |
|--|---------------------------------------------------------------------------------------------------------------------------------------------------------------------------------------------------------------------------------------------------------------------------------------|--------------------------------------------------------------------------------------------------|
|  |                                                                                                                                                                                                                                                                                       | Have a positive impact on users' health knowledge and empowerment?                               |
|  |                                                                                                                                                                                                                                                                                       | Have a positive impact in users' digital skills?                                                 |
|  |                                                                                                                                                                                                                                                                                       | Have a positive impact in users' employability and/or work conditions?                           |
|  |                                                                                                                                                                                                                                                                                       | Be translatable (language; flexibility to allow iterations) to other settings?                   |
|  |                                                                                                                                                                                                                                                                                       | Have a positive impact on user's social opportunities?                                           |
|  |                                                                                                                                                                                                                                                                                       | Have a positive impact on user's health outcomes?                                                |
|  |                                                                                                                                                                                                                                                                                       | Present a beneficial cost-benefit ratio for the institutions that have implemented the solution? |
|  |                                                                                                                                                                                                                                                                                       | Present a beneficial cost-benefit ratio for the overall health care system?                      |
|  |                                                                                                                                                                                                                                                                                       | Have a positive impact on health care systems resilience?                                        |
|  |                                                                                                                                                                                                                                                                                       | Have positive environmental impacts?                                                             |
|  |                                                                                                                                                                                                                                                                                       | Take into account regional disparities when it comes to access to health care and education?     |
|  | <p>Please, provide links that corroborate the previous answers</p> <p>Examples: Links to innovative practice's repository entry, to regional websites with documentation on the solution, and scientific papers relating with the development and implementation of the practice.</p> |                                                                                                  |
|  | <p>Is the innovative practice going to be posted to Futurium?</p>                                                                                                                                                                                                                     | Yes (share link in the previous question)                                                        |
|  |                                                                                                                                                                                                                                                                                       | It is already posted in Futurium (share link in the previous question)                           |
|  |                                                                                                                                                                                                                                                                                       | No, due to lack of familiarity with Futurium                                                     |
|  |                                                                                                                                                                                                                                                                                       | No, it is already posted somewhere else (share link in the previous question)                    |
|  | <p>Is impact evaluation going to be performed during this activity?<br/>(Mark one option with an X)</p>                                                                                                                                                                               | No                                                                                               |
|  |                                                                                                                                                                                                                                                                                       | Yes, using MAFEIP                                                                                |
|  |                                                                                                                                                                                                                                                                                       | Yes, using another tool (specify in "others")                                                    |

|  |                                                                       |                                                         |
|--|-----------------------------------------------------------------------|---------------------------------------------------------|
|  | Note: Twinning participants will be able to use MAFEIP free of charge | Uncertain (will update on a later stage of the process) |
|  |                                                                       | Other                                                   |

|                                                             |                                                                                                                                                                                                                                                                                                                                                                                      |  |
|-------------------------------------------------------------|--------------------------------------------------------------------------------------------------------------------------------------------------------------------------------------------------------------------------------------------------------------------------------------------------------------------------------------------------------------------------------------|--|
| <b>Budget breakdown</b><br>(to be filled in by the Adopter) | <b>What is the estimated budget for travel expenses?</b>                                                                                                                                                                                                                                                                                                                             |  |
|                                                             | Please state: <ul style="list-style-type: none"> <li>• Number of activities, and, for each activity:                         <ul style="list-style-type: none"> <li>○ Objective, hosting region, date</li> <li>○ Nr of people travelling</li> <li>○ Accommodation costs (per night)</li> <li>○ Travel costs</li> <li>○ Other costs (local transport and food)</li> </ul> </li> </ul> |  |

|                                                            |                                                |                                                  |  |
|------------------------------------------------------------|------------------------------------------------|--------------------------------------------------|--|
| <b>Twining details</b><br>(to be filled in by the Adopter) | <b>Objectives of the twinning</b>              |                                                  |  |
|                                                            | <b>Twining type</b><br>Mark 1 option with an X | Knowledge exchange and training                  |  |
|                                                            |                                                | Adaptation                                       |  |
|                                                            |                                                | Partial adoption                                 |  |
|                                                            |                                                | Full adoption                                    |  |
|                                                            |                                                | Acquisition                                      |  |
|                                                            | <b>What types of activities are planned?</b>   | In person meetings between twinning participants |  |
|                                                            |                                                | Webinars and/ or Workshops                       |  |
|                                                            |                                                | In person conferences                            |  |
|                                                            |                                                | Online conferences                               |  |
|                                                            |                                                | Joint scientific papers                          |  |
|                                                            |                                                | Training sessions for adopters                   |  |
|                                                            |                                                | Training sessions for users                      |  |
|                                                            |                                                | Testing and development activities               |  |

|  |                                                                                                                                                                                                                                                                                                                                                                                                                                                                                                                                                                                                                                                                                                                                                                                                               |                                                          |  |
|--|---------------------------------------------------------------------------------------------------------------------------------------------------------------------------------------------------------------------------------------------------------------------------------------------------------------------------------------------------------------------------------------------------------------------------------------------------------------------------------------------------------------------------------------------------------------------------------------------------------------------------------------------------------------------------------------------------------------------------------------------------------------------------------------------------------------|----------------------------------------------------------|--|
|  |                                                                                                                                                                                                                                                                                                                                                                                                                                                                                                                                                                                                                                                                                                                                                                                                               | User Studies and/or user-solution interaction activities |  |
|  |                                                                                                                                                                                                                                                                                                                                                                                                                                                                                                                                                                                                                                                                                                                                                                                                               | Policy, programme, or technical discussions              |  |
|  |                                                                                                                                                                                                                                                                                                                                                                                                                                                                                                                                                                                                                                                                                                                                                                                                               | Language, translation, and similar activities            |  |
|  | <b>Action plan description</b><br>Provide us with an overview of the prospective tasks required to execute the planned activities, along with a timeline and steps for their implementation                                                                                                                                                                                                                                                                                                                                                                                                                                                                                                                                                                                                                   |                                                          |  |
|  | <b>Twinning readiness self-assessment scale: What challenges you believe will be faced in this activity?</b><br>(mark with an x all options that apply)<br><br>This scale presents the perceived challenges from former twinning participants, as described in the Scale AHA (2015) study ( <a href="https://www.scale-aha.eu/fileadmin/documents/scaleaha_d5.4_finalstudyreport.pdf">https://www.scale-aha.eu/fileadmin/documents/scaleaha_d5.4_finalstudyreport.pdf</a> ), by Empirica. Select the difficulties you are anticipating facing in implementing the proposed twinning in your region. Answers in this question will not be used to evaluate the merits of the application but serve as a point of reflection on possible challenging aspects that may still be addressed early in the activity. | Organizational structures and related barriers           |  |
|  |                                                                                                                                                                                                                                                                                                                                                                                                                                                                                                                                                                                                                                                                                                                                                                                                               | Lack of interdisciplinary communication and cooperation  |  |
|  |                                                                                                                                                                                                                                                                                                                                                                                                                                                                                                                                                                                                                                                                                                                                                                                                               | Low digital literacy of the target group                 |  |
|  |                                                                                                                                                                                                                                                                                                                                                                                                                                                                                                                                                                                                                                                                                                                                                                                                               | Lack of interoperability and system integration          |  |
|  |                                                                                                                                                                                                                                                                                                                                                                                                                                                                                                                                                                                                                                                                                                                                                                                                               | Financial and reimbursement problems                     |  |
|  |                                                                                                                                                                                                                                                                                                                                                                                                                                                                                                                                                                                                                                                                                                                                                                                                               | Resistance to change/Scepticisms about effectiveness     |  |
|  |                                                                                                                                                                                                                                                                                                                                                                                                                                                                                                                                                                                                                                                                                                                                                                                                               | Lack of awareness among professionals and patients       |  |
|  |                                                                                                                                                                                                                                                                                                                                                                                                                                                                                                                                                                                                                                                                                                                                                                                                               | Technical barriers (infrastructure, connectivity...)     |  |
|  | <b>Provide a timeframe for procurement / implementation until end of 2022.</b><br><br>How do you expect to buy and/or implement the innovative practice by the end of the year? - please state the major milestones, time wise, to achieve.                                                                                                                                                                                                                                                                                                                                                                                                                                                                                                                                                                   |                                                          |  |
|  | <b>What are the expected impacts of the twinning for your organization?</b>                                                                                                                                                                                                                                                                                                                                                                                                                                                                                                                                                                                                                                                                                                                                   |                                                          |  |

|  |                                                                                                                                                                                                                                                                                                                                                                                                               |  |
|--|---------------------------------------------------------------------------------------------------------------------------------------------------------------------------------------------------------------------------------------------------------------------------------------------------------------------------------------------------------------------------------------------------------------|--|
|  | <p>What are the expected changes and improvements to be gained from this activity, both after the twinning is completed (6 months) and in the long term (&gt; 6 months) and how will they be measured or compared?</p>                                                                                                                                                                                        |  |
|  | <p><b>What are the expected impacts of the twinning for your regional ecosystem?</b></p> <p>For example, in terms of knowledge and know-how transfer, improvement of citizen's lives (psychosocial and health wise), better outcomes for health care expenditure and quality of care provided, positive economic impacts (increase in nr of jobs and SMEs created, business opportunities), among others.</p> |  |

|                                                                                                           |                                                                                                                                                                                                                                                                    |                                     |     |    |  |
|-----------------------------------------------------------------------------------------------------------|--------------------------------------------------------------------------------------------------------------------------------------------------------------------------------------------------------------------------------------------------------------------|-------------------------------------|-----|----|--|
| <p><b>Other requirements</b><br/>(to be filled in in <u>agreement between Originator and adopter</u>)</p> | <p>Is the adopter or originator benefiting from the EU Structural Funds in the field of active and healthy ageing?</p>                                                                                                                                             | Originator                          | Yes | No |  |
|                                                                                                           | <p>Are both adopter and originator willing to document their progress and report their twinning outcomes to the IN-4-AHA project?</p> <p>To fill out the Mid-term and final reports, as well as providing regular informal feedback via email and video calls.</p> | Adopter                             |     |    |  |
|                                                                                                           | <p>I (Contact persons) confirm that the content of this joint application has been agreed between the adopter and the originator applicants. I further provide my contact details (name, email) in case of any questions relating to the application</p>           | I confirm (Originator)              |     |    |  |
|                                                                                                           |                                                                                                                                                                                                                                                                    | I confirm (Adopter)                 |     |    |  |
|                                                                                                           |                                                                                                                                                                                                                                                                    | Contact name signature (Originator) |     |    |  |
|                                                                                                           |                                                                                                                                                                                                                                                                    | Contact name signature (Adopter)    |     |    |  |

## Appendix 2 - Midterm report

| Innovative practice being shared (add an X next to the correct answer) |  |
|------------------------------------------------------------------------|--|
| Actif Age platform                                                     |  |
| ClicSalud                                                              |  |
| Apps4Dementia Library                                                  |  |
| Inspired Reminiscence and CLEAR dementia apps                          |  |
| Healthy Lifestyle Assessment Toolkit                                   |  |
| Lab Saud                                                               |  |
| My Home Fits and Smart Library projects                                |  |
| Plant-based protein enriched baked foods for older persons             |  |
| SoCaTel                                                                |  |
| Andalusian Health Population Database                                  |  |

## Originator

| So far, all the programmed activities from your side have been executed? |  |
|--------------------------------------------------------------------------|--|
| Yes                                                                      |  |
| No                                                                       |  |

| If not, please describe which ones and why. |
|---------------------------------------------|
|                                             |

| What progress has been done in terms of adapting the innovative practice to its's new setting? |
|------------------------------------------------------------------------------------------------|
|                                                                                                |

| What still needs to be done in this regard? |
|---------------------------------------------|
|                                             |

## Adopter

| So far, all the programmed activities from your side have been executed? |  |
|--------------------------------------------------------------------------|--|
| Yes                                                                      |  |
| No                                                                       |  |

| If not, please describe which ones and why. |
|---------------------------------------------|
|                                             |

| What have been the challenges in implementing the innovation, so far? |
|-----------------------------------------------------------------------|
|                                                                       |

**What mitigation measures (if needed) are being developed to resolve these issues?**

**What have been the short-term impacts, so far, for the population the solution is addressed to?**

**Appendix 3 - Final report**

|                                                                                                |                                                                                                                 |                                                                                                                                                      |  |
|------------------------------------------------------------------------------------------------|-----------------------------------------------------------------------------------------------------------------|------------------------------------------------------------------------------------------------------------------------------------------------------|--|
| Originator                                                                                     | Please provide the name and brief description of the innovative practice that was the object of this twinning   |                                                                                                                                                      |  |
|                                                                                                | Please describe the evolution of how the innovative practice was established at your reference site, including: | a. background, motivation/need, the health or healthcare problems that your innovation addresses                                                     |  |
|                                                                                                |                                                                                                                 | b. process and time for adoption (post-development)                                                                                                  |  |
|                                                                                                |                                                                                                                 | c. costs and outcomes (are there any data available from evaluation(s)?)                                                                             |  |
|                                                                                                |                                                                                                                 | d. has a business case for sustainability or scaling up of adoption been made (by the healthcare entities or by the solution developers, or others)? |  |
| What were the barriers (e.g. political, organisational, technical, etc.) you experienced? What |                                                                                                                 |                                                                                                                                                      |  |



|  |                                                                                                                                          |  |
|--|------------------------------------------------------------------------------------------------------------------------------------------|--|
|  | were the mitigating factors for overcoming the experienced problems?                                                                     |  |
|  | What were the success factors (e.g. incentives, use of champions, new models, etc.) that facilitated the implementation of the solution? |  |
|  | How has this activity benefited the stakeholders that directly took part in it? And the overall Originator organization?                 |  |

|                |                                                                                                                                                                                                                                             |  |
|----------------|---------------------------------------------------------------------------------------------------------------------------------------------------------------------------------------------------------------------------------------------|--|
| <b>Adopter</b> | What triggered your interest in adopting the innovative practice of the originator?                                                                                                                                                         |  |
|                | What needs in your environment does this innovative practice address? How does it relate to the vision and strategy of your region/city? How does it fit into your investment plans and availability of funding and organisational support? |  |
|                | What benefits and new opportunities for different stakeholders will the innovative practice offer once implemented? What changes will it invoke (e.g. new care pathways, new business models, new roles, etc.)?                             |  |

|  |                                                                                                                                                                                                                                                                                      |  |
|--|--------------------------------------------------------------------------------------------------------------------------------------------------------------------------------------------------------------------------------------------------------------------------------------|--|
|  | Please describe the observed and expected outcomes of the twinning activities. How many citizens have/will benefit from the adoption of the innovative practice in your region/city?                                                                                                 |  |
|  | Have any barriers to the adoption been identified, and how do you plan to overcome them?                                                                                                                                                                                             |  |
|  | What budget was spent (or will be spent, please also specify the time horizon) in total for adopting the innovation practice?                                                                                                                                                        |  |
|  | What other financing / funding instruments at EU (e.g. ESIF), national or regional level were enacted (or will be enacted, please specify) to support the twinning and / or the implementation of the innovative practice? What were the challenges faced when seeking such funding? |  |
|  | Please highlight the scale of the twinning, providing figures such as number of citizens affected or potentially affected by the twinning work, number of professionals recruited, etc.                                                                                              |  |
|  | Did the twinning result in implementation (adaptation, partial or full adoption, acquisition) of the innovative practice in the adopting region?                                                                                                                                     |  |
|  | If the twinning did not result in implementation: What were the reasons not to move towards                                                                                                                                                                                          |  |

|  |                                                                                                                       |  |
|--|-----------------------------------------------------------------------------------------------------------------------|--|
|  | implementation of the solution?                                                                                       |  |
|  | How has this activity benefited the stakeholders that directly took part in it, and the overall Adopter organization? |  |

|                               |                                                                                                                                                                                                                         |  |
|-------------------------------|-------------------------------------------------------------------------------------------------------------------------------------------------------------------------------------------------------------------------|--|
| <b>Originator and Adopter</b> | How do/will you measure and evaluate the degree of success of the implementation of the innovative practice? Have/will you apply any tools, metrics, or indicators to continuously evaluate the expected outcomes?      |  |
|                               | Please describe the concrete plan (with milestones) to transfer the solution from the originator to the adopter<br>Please update and elaborate further on the information provided in your application                  |  |
|                               | Considering the identified and/or anticipated barriers to the adoption of innovative practices, please provide concrete suggestions for policy decision makers how to address these at regional, national and EU level. |  |
|                               | Please, give us some feedback on your experience with the IN-4-AHA Twinings, and how to improve them in the future                                                                                                      |  |
